# Supplementary material for: Sub-Doppler infrared spectroscopy of resonance-stabilized hydrocarbon intermediates: ν3/ν4 CH stretch modes and CH2 internal rotor dynamics of benzyl radical
Source: Royal Society of Chemistry journal article supplement (doi:10.1039/c7cp05776h), 2017-01-01
Supplement: c7cp05776h2.pdf [file c7cp05776h2.pdf]

II. Observed and fitted gnd state 2-line combination differences  
 from JILA measured nu\_3 and nu\_4 bands and Miller et al.

Residual std dev: 0.0025

| J'    | Ka' | Kc' | J'' | Ka'' | Kc'' | Obs                 | Calc                | Obs-<br>Calc        | Weighting factors |
|-------|-----|-----|-----|------|------|---------------------|---------------------|---------------------|-------------------|
| nu_3: |     |     |     |      |      | [cm <sup>-1</sup> ] | [cm <sup>-1</sup> ] | [cm <sup>-1</sup> ] |                   |
| 6     | 0   | 6   | 4   | 0    | 4    | 1.46496             | 1.46381             | 0.00006             | 0.5               |
| 6     | 1   | 6   | 4   | 1    | 4    | 1.44593             | 1.44460             | 0.00005             | 0.5               |
| 7     | 0   | 7   | 5   | 0    | 5    | 1.70281             | 1.70149             | 0.00006             | 0.5               |
| 7     | 1   | 7   | 5   | 1    | 5    | 1.69241             | 1.69164             | 0.00006             | 0.5               |
| 8     | 0   | 8   | 6   | 0    | 6    | 1.94271             | 1.94101             | 0.00007             | 0.5               |
| 8     | 1   | 7   | 6   | 1    | 5    | 2.21259             | 2.21677             | 0.00030             | 0.5               |
| 8     | 1   | 8   | 6   | 1    | 6    | 1.93902             | 1.93638             | 0.00007             | 0.5               |
| 8     | 2   | 7   | 6   | 2    | 4    | 2.14798             | 2.15405             | 0.00022             | 0.5               |
| 9     | 0   | 9   | 7   | 0    | 7    | 2.18392             | 2.18194             | 0.00008             | 0.5               |
| 9     | 1   | 8   | 7   | 1    | 6    | 2.44971             | 2.44883             | 0.00029             | 0.5               |
| 9     | 1   | 9   | 7   | 1    | 7    | 2.17984             | 2.17989             | 0.00008             | 0.5               |
| 9     | 2   | 8   | 7   | 2    | 6    | 2.40952             | 2.40987             | 0.00025             | 0.5               |
| 10    | 0   | 10  | 8   | 0    | 8    | 2.42726             | 2.42366             | 0.00010             | 0.5               |
| 10    | 1   | 9   | 8   | 1    | 7    | 2.68759             | 2.68177             | 0.00030             | 0.5               |
| 10    | 1   | 10  | 8   | 1    | 8    | 2.42463             | 2.42278             | 0.00010             | 0.5               |
| 10    | 2   | 9   | 8   | 2    | 7    | 2.66341             | 2.66025             | 0.00028             | 0.5               |
| 11    | 0   | 11  | 9   | 0    | 9    | 2.66709             | 2.66579             | 0.00012             | 1                 |
| 11    | 1   | 10  | 9   | 1    | 8    | 2.91925             | 2.91795             | 0.00031             | 0.5               |
| 11    | 1   | 11  | 9   | 1    | 9    | 2.66709             | 2.66542             | 0.00012             | 1                 |
| 11    | 2   | 10  | 9   | 2    | 8    | 2.90644             | 2.90702             | 0.00030             | 0.5               |
| 12    | 0   | 12  | 10  | 0    | 10   | 2.91062             | 2.90812             | 0.00014             | 1                 |
| 12    | 1   | 11  | 10  | 1    | 9    | 3.15835             | 3.15688             | 0.00033             | 0.5               |
| 12    | 1   | 12  | 10  | 1    | 10   | 2.91062             | 2.90797             | 0.00014             | 1                 |
| 12    | 2   | 11  | 10  | 2    | 9    | 3.14719             | 3.15165             | 0.00032             | 0.5               |
| 13    | 0   | 13  | 11  | 0    | 11   | 3.15222             | 3.15056             | 0.00016             | 1                 |
| 13    | 1   | 12  | 11  | 1    | 10   | 3.39597             | 3.39754             | 0.00034             | 0.5               |
| 13    | 1   | 13  | 11  | 1    | 11   | 3.15222             | 3.15050             | 0.00016             | 1                 |
| 13    | 2   | 12  | 11  | 2    | 10   | 3.39476             | 3.39514             | 0.00034             | 0.5               |
| 14    | 0   | 14  | 12  | 0    | 12   | 3.39457             | 3.39306             | 0.00019             | 1                 |
| 14    | 1   | 13  | 12  | 1    | 11   | 3.63947             | 3.63915             | 0.00036             | 0.5               |
| 14    | 1   | 14  | 12  | 1    | 12   | 3.39457             | 3.39304             | 0.00019             | 1                 |
| 14    | 2   | 13  | 12  | 2    | 11   | 3.63790             | 3.63809             | 0.00036             | 0.5               |

|    |   |    |    |   |    |         |         |         |   |
|----|---|----|----|---|----|---------|---------|---------|---|
| 15 | 0 | 15 | 13 | 0 | 13 | 3.63734 | 3.63562 | 0.00022 | 1 |
| 15 | 1 | 14 | 13 | 1 | 12 | 3.87974 | 3.88128 | 0.00038 | 1 |
| 15 | 1 | 15 | 13 | 1 | 13 | 3.63734 | 3.63561 | 0.00022 | 1 |
| 15 | 2 | 14 | 13 | 2 | 12 | 3.87857 | 3.88082 | 0.00038 | 1 |
| 16 | 0 | 16 | 14 | 0 | 14 | 3.88008 | 3.87822 | 0.00025 | 1 |
| 16 | 1 | 15 | 14 | 1 | 13 | 4.12341 | 4.12368 | 0.00040 | 1 |
| 16 | 1 | 16 | 14 | 1 | 14 | 3.88008 | 3.87822 | 0.00025 | 1 |
| 16 | 2 | 15 | 14 | 2 | 13 | 4.12341 | 4.12349 | 0.00040 | 1 |
| 17 | 0 | 17 | 15 | 0 | 15 | 4.12204 | 4.12085 | 0.00029 | 1 |
| 17 | 1 | 16 | 15 | 1 | 14 | 4.36650 | 4.36624 | 0.00042 | 1 |
| 17 | 1 | 17 | 15 | 1 | 15 | 4.12204 | 4.12085 | 0.00029 | 1 |
| 17 | 2 | 16 | 15 | 2 | 14 | 4.36650 | 4.36616 | 0.00042 | 1 |
| 18 | 0 | 18 | 16 | 0 | 16 | 4.36468 | 4.36353 | 0.00032 | 1 |
| 18 | 1 | 18 | 16 | 1 | 16 | 4.36468 | 4.36352 | 0.00032 | 1 |
| 19 | 0 | 19 | 17 | 0 | 17 | 4.60710 | 4.60623 | 0.00036 | 1 |
| 19 | 1 | 19 | 17 | 1 | 17 | 4.60710 | 4.60623 | 0.00036 | 1 |
| 20 | 0 | 20 | 18 | 0 | 18 | 4.84885 | 4.84897 | 0.00041 | 1 |
| 20 | 1 | 20 | 18 | 1 | 18 | 4.84885 | 4.84897 | 0.00041 | 1 |
| 21 | 0 | 21 | 19 | 0 | 19 | 5.09112 | 5.09174 | 0.00045 | 1 |
| 21 | 1 | 21 | 19 | 1 | 19 | 5.09112 | 5.09174 | 0.00045 | 1 |
| 22 | 0 | 22 | 20 | 0 | 20 | 5.33030 | 5.33454 | 0.00050 | 1 |
| 22 | 1 | 22 | 20 | 1 | 20 | 5.33030 | 5.33454 | 0.00050 | 1 |
| 23 | 0 | 23 | 21 | 0 | 21 | 5.57387 | 5.57738 | 0.00055 | 1 |
| 23 | 1 | 23 | 21 | 1 | 21 | 5.57387 | 5.57738 | 0.00055 | 1 |
| 24 | 0 | 24 | 22 | 0 | 22 | 5.81908 | 5.82024 | 0.00061 | 1 |
| 24 | 1 | 24 | 22 | 1 | 22 | 5.81908 | 5.82024 | 0.00061 | 1 |
| 25 | 0 | 25 | 23 | 0 | 23 | 6.06202 | 6.06314 | 0.00067 | 1 |
| 25 | 1 | 25 | 23 | 1 | 23 | 6.06202 | 6.06314 | 0.00067 | 1 |
| 26 | 0 | 26 | 24 | 0 | 24 | 6.30444 | 6.30608 | 0.00073 | 1 |
| 26 | 1 | 26 | 24 | 1 | 24 | 6.30444 | 6.30608 | 0.00073 | 1 |

nu 4:

|   |   |   |   |   |   |         |         |         |   |
|---|---|---|---|---|---|---------|---------|---------|---|
| 5 | 0 | 5 | 3 | 0 | 3 | 1.22900 | 1.22656 | 0.00006 | 1 |
| 5 | 1 | 5 | 3 | 1 | 3 | 1.19700 | 1.19387 | 0.00004 | 1 |
| 6 | 0 | 6 | 4 | 0 | 4 | 1.46630 | 1.46381 | 0.00006 | 1 |
| 6 | 1 | 5 | 4 | 1 | 3 | 1.97840 | 1.97795 | 0.00032 | 1 |
| 6 | 1 | 6 | 4 | 1 | 4 | 1.44640 | 1.44460 | 0.00005 | 1 |
| 7 | 0 | 7 | 5 | 0 | 5 | 1.70350 | 1.70149 | 0.00006 | 1 |
| 7 | 1 | 6 | 5 | 1 | 4 | 2.15180 | 2.15405 | 0.00022 | 1 |
| 7 | 1 | 7 | 5 | 1 | 5 | 1.69380 | 1.69164 | 0.00006 | 1 |
| 7 | 2 | 6 | 5 | 2 | 4 | 2.21700 | 2.21677 | 0.00030 | 1 |
| 8 | 0 | 8 | 6 | 0 | 6 | 1.94450 | 1.94101 | 0.00007 | 1 |
| 8 | 1 | 7 | 6 | 1 | 5 | 2.41190 | 2.40987 | 0.00025 | 1 |

|    |   |    |    |   |    |         |         |         |   |
|----|---|----|----|---|----|---------|---------|---------|---|
| 8  | 1 | 8  | 6  | 1 | 6  | 1.93810 | 1.93638 | 0.00007 | 1 |
| 8  | 2 | 7  | 6  | 2 | 5  | 2.44830 | 2.44883 | 0.00029 | 1 |
| 9  | 0 | 9  | 7  | 0 | 7  | 2.18240 | 2.18194 | 0.00008 | 2 |
| 9  | 1 | 8  | 7  | 1 | 6  | 2.65890 | 2.66025 | 0.00028 | 1 |
| 9  | 1 | 9  | 7  | 1 | 7  | 2.18240 | 2.17989 | 0.00008 | 2 |
| 9  | 2 | 8  | 7  | 2 | 6  | 2.68220 | 2.68177 | 0.00030 | 1 |
| 10 | 0 | 10 | 8  | 0 | 8  | 2.42446 | 2.42366 | 0.00010 | 2 |
| 10 | 1 | 9  | 8  | 1 | 7  | 2.90435 | 2.90702 | 0.00030 | 1 |
| 10 | 1 | 10 | 8  | 1 | 8  | 2.42446 | 2.42278 | 0.00010 | 2 |
| 10 | 2 | 9  | 8  | 2 | 7  | 2.91840 | 2.91795 | 0.00031 | 1 |
| 11 | 0 | 11 | 9  | 0 | 9  | 2.66830 | 2.66579 | 0.00012 | 2 |
| 11 | 1 | 11 | 9  | 1 | 9  | 2.66830 | 2.66542 | 0.00012 | 2 |
| 12 | 0 | 12 | 10 | 0 | 10 | 2.91100 | 2.90812 | 0.00014 | 2 |
| 12 | 1 | 11 | 10 | 1 | 9  | 3.15460 | 3.15688 | 0.00033 | 2 |
| 12 | 1 | 12 | 10 | 1 | 10 | 2.91100 | 2.90797 | 0.00014 | 2 |
| 13 | 2 | 12 | 10 | 2 | 9  | 3.39230 | 3.39514 | 0.00034 | 2 |
| 13 | 0 | 13 | 11 | 0 | 11 | 3.15250 | 3.15056 | 0.00016 | 2 |
| 13 | 1 | 12 | 11 | 1 | 10 | 3.39909 | 3.39754 | 0.00034 | 2 |
| 13 | 1 | 13 | 11 | 1 | 11 | 3.15250 | 3.15050 | 0.00016 | 2 |
| 14 | 0 | 14 | 12 | 0 | 12 | 3.39481 | 3.39306 | 0.00019 | 2 |
| 14 | 1 | 13 | 12 | 1 | 11 | 3.63730 | 3.63915 | 0.00036 | 2 |
| 14 | 1 | 14 | 12 | 1 | 12 | 3.39481 | 3.39304 | 0.00019 | 2 |
| 14 | 2 | 13 | 12 | 2 | 10 | 3.63730 | 3.63809 | 0.00036 | 2 |
| 15 | 0 | 15 | 13 | 0 | 13 | 3.63960 | 3.63562 | 0.00022 | 2 |
| 15 | 1 | 14 | 13 | 1 | 12 | 3.87990 | 3.88128 | 0.00038 | 2 |
| 15 | 1 | 15 | 13 | 1 | 13 | 3.63960 | 3.63561 | 0.00022 | 2 |
| 15 | 2 | 14 | 13 | 2 | 12 | 3.87990 | 3.88082 | 0.00038 | 2 |
| 16 | 0 | 16 | 14 | 0 | 14 | 3.88020 | 3.87822 | 0.00025 | 2 |
| 16 | 1 | 16 | 14 | 1 | 14 | 3.88020 | 3.87822 | 0.00025 | 2 |

Miller et al.:

|   |   |   |   |   |   |         |         |         |     |
|---|---|---|---|---|---|---------|---------|---------|-----|
| 2 | 2 | 0 | 0 | 0 | 0 | 0.89472 | 0.89347 | 0.00037 | 0.4 |
| 3 | 3 | 1 | 0 | 1 | 0 | 1.61185 | 1.61369 | 0.00088 | 0.4 |
| 2 | 2 | 1 | 1 | 0 | 1 | 0.73721 | 0.73684 | 0.00039 | 0.4 |
| 2 | 2 | 1 | 1 | 0 | 1 | 0.73721 | 0.73684 | 0.00039 | 0.4 |
| 4 | 0 | 4 | 2 | 0 | 2 | 0.98555 | 0.98362 | 0.00007 | 0.4 |
| 3 | 2 | 2 | 2 | 0 | 2 | 0.89352 | 0.89374 | 0.00032 | 0.4 |
| 5 | 1 | 4 | 3 | 1 | 2 | 1.44580 | 1.44208 | 0.00029 | 0.4 |
| 5 | 1 | 5 | 3 | 1 | 3 | 1.19479 | 1.19387 | 0.00004 | 0.4 |
| 4 | 2 | 3 | 3 | 2 | 1 | 0.56873 | 0.57036 | 0.00026 | 0.4 |
| 4 | 2 | 3 | 3 | 2 | 1 | 0.57406 | 0.57036 | 0.00026 | 0.4 |
| 5 | 5 | 0 | 3 | 3 | 0 | 3.10258 | 3.09962 | 0.00248 | 0.4 |
| 4 | 3 | 2 | 3 | 3 | 0 | 0.61289 | 0.61259 | 0.00077 | 0.4 |

|    |   |    |   |   |   |         |         |         |     |
|----|---|----|---|---|---|---------|---------|---------|-----|
| 6  | 0 | 6  | 4 | 0 | 4 | 1.46805 | 1.46381 | 0.00006 | 0.4 |
| 5  | 3 | 3  | 4 | 1 | 3 | 1.51848 | 1.52297 | 0.00065 | 0.4 |
| 6  | 0 | 6  | 4 | 1 | 4 | 1.44640 | 1.44460 | 0.00005 | 0.4 |
| 6  | 2 | 5  | 4 | 2 | 3 | 1.62080 | 1.61950 | 0.00019 | 0.4 |
| 6  | 4 | 3  | 4 | 2 | 3 | 3.00905 | 3.00698 | 0.00128 | 0.4 |
| 6  | 1 | 2  | 4 | 2 | 4 | 2.26590 | 2.27055 | 0.00126 | 0.4 |
| 6  | 2 | 5  | 5 | 0 | 5 | 1.45611 | 1.45543 | 0.00019 | 0.4 |
| 6  | 2 | 5  | 5 | 2 | 3 | 0.71923 | 0.72177 | 0.00019 | 0.4 |
| 6  | 4 | 3  | 5 | 2 | 3 | 2.10796 | 2.10925 | 0.00128 | 0.4 |
| 7  | 2 | 6  | 5 | 2 | 4 | 1.89110 | 1.89101 | 0.00020 | 0.4 |
| 7  | 4 | 4  | 5 | 2 | 4 | 3.35048 | 3.34872 | 0.00109 | 0.4 |
| 8  | 0 | 8  | 6 | 0 | 6 | 1.94194 | 1.94101 | 0.00007 | 0.4 |
| 10 | 0 | 10 | 8 | 0 | 8 | 2.42564 | 2.42366 | 0.00010 | 0.4 |
| 10 | 1 | 10 | 8 | 1 | 8 | 2.42564 | 2.42278 | 0.00010 | 0.4 |
