# Supplementary material for: Sub-Doppler infrared spectroscopy of resonance-stabilized hydrocarbon intermediates: ν3/ν4 CH stretch modes and CH2 internal rotor dynamics of benzyl radical
Source: Royal Society of Chemistry journal article supplement (doi:10.1039/c7cp05776h), 2017-01-01
Supplement: c7cp05776h4.pdf [file c7cp05776h4.pdf]

IV. Observed and fitted positions of the **nu\_3** excited state, assuming gnd state fitted to combination differences from JILA data (nu\_3 and nu\_4 bands) plus Miller's LIF data

Residual std  
 dev: 0.0029

| Excited state (v=1): |     |     | Gnd State (v=0): |      |      | Observed<br>[cm <sup>-1</sup> ] | Calculated<br>[cm <sup>-1</sup> ] | Obs-Calc<br>[cm <sup>-1</sup> ] | Weighting<br>factors |     |
|----------------------|-----|-----|------------------|------|------|---------------------------------|-----------------------------------|---------------------------------|----------------------|-----|
| J'                   | Ka' | Kc' | J''              | Ka'' | Kc'' |                                 |                                   |                                 |                      |     |
| P                    |     |     |                  |      |      |                                 |                                   |                                 |                      |     |
| Branch               |     |     |                  |      |      |                                 |                                   |                                 |                      |     |
|                      | 4   | 1   | 4                | 5    | 0    | 5                               | 3072.5845                         | 3072.5849                       | -0.0004              | 1   |
|                      | 4   | 0   | 4                | 5    | 1    | 5                               | 3072.5475                         | 3072.5503                       | -0.0028              | 1   |
|                      | 5   | 1   | 5                | 6    | 0    | 6                               | 3072.4538                         | 3072.4542                       | -0.0004              | 1   |
|                      | 5   | 0   | 5                | 6    | 1    | 6                               | 3072.4364                         | 3072.4377                       | -0.0013              | 1   |
|                      | 6   | 1   | 6                | 7    | 0    | 7                               | 3072.3273                         | 3072.3281                       | -0.0008              | 1   |
|                      | 6   | 2   | 5                | 7    | 1    | 6                               | 3072.2664                         | 3072.268                        | -0.0017              | 1   |
|                      | 6   | 0   | 6                | 7    | 1    | 7                               | 3072.3197                         | 3072.3208                       | -0.0011              | 1   |
|                      | 7   | 1   | 7                | 8    | 0    | 8                               | 3072.2033                         | 3072.2045                       | -0.0011              | 1   |
|                      | 7   | 2   | 6                | 8    | 1    | 7                               | 3072.1171                         | 3072.1145                       | 0.0027               | 1   |
|                      | 7   | 0   | 7                | 8    | 1    | 8                               | 3072.1992                         | 3072.2013                       | -0.0021              | 1   |
|                      | 7   | 1   | 6                | 8    | 2    | 7                               | 3072.0427                         | 3072.0408                       | 0.0019               | 1   |
|                      | 8   | 1   | 8                | 9    | 0    | 9                               | 3072.0801                         | 3072.0819                       | -0.0018              | 0.5 |
|                      | 8   | 2   | 7                | 9    | 1    | 8                               | 3071.9739                         | 3071.9742                       | -0.0003              | 0.5 |
|                      | 8   | 0   | 8                | 9    | 1    | 9                               | 3072.0801                         | 3072.0807                       | -0.0005              | 0.5 |
|                      | 8   | 1   | 7                | 9    | 2    | 8                               | 3071.9347                         | 3071.9368                       | -0.0021              | 0.5 |
|                      | 9   | 1   | 9                | 10   | 0    | 10                              | 3071.9579                         | 3071.9599                       | -0.002               | 0.5 |
|                      | 9   | 2   | 8                | 10   | 1    | 9                               | 3071.8399                         | 3071.8425                       | -0.0026              | 1   |
|                      | 9   | 0   | 9                | 10   | 1    | 10                              | 3071.9579                         | 3071.9594                       | -0.0015              | 0.5 |
|                      | 9   | 1   | 8                | 10   | 2    | 9                               | 3071.8206                         | 3071.8247                       | -0.0041              | 1   |
|                      | 10  | 1   | 10               | 11   | 0    | 11                              | 3071.8367                         | 3071.838                        | -0.0013              | 0.5 |
|                      | 10  | 2   | 9                | 11   | 1    | 10                              | 3071.7131                         | 3071.7156                       | -0.0024              | 1   |
|                      | 10  | 0   | 10               | 11   | 1    | 11                              | 3071.8367                         | 3071.8378                       | -0.0011              | 0.5 |
|                      | 10  | 1   | 9                | 11   | 2    | 10                              | 3071.7072                         | 3071.7075                       | -0.0002              | 1   |
|                      | 11  | 1   | 11               | 12   | 0    | 12                              | 3071.7146                         | 3071.7162                       | -0.0017              | 0.5 |
|                      | 11  | 2   | 10               | 12   | 1    | 11                              | 3071.5867                         | 3071.5911                       | -0.0043              | 1   |
|                      | 11  | 0   | 11               | 12   | 1    | 12                              | 3071.7146                         | 3071.7161                       | -0.0016              | 0.5 |
|                      | 11  | 1   | 10               | 12   | 2    | 11                              | 3071.5834                         | 3071.5875                       | -0.0041              | 1   |

|    |   |    |    |   |    |           |           |         |     |
|----|---|----|----|---|----|-----------|-----------|---------|-----|
| 12 | 1 | 12 | 13 | 0 | 13 | 3071.5921 | 3071.5944 | -0.0024 | 0.5 |
| 12 | 2 | 11 | 13 | 1 | 12 | 3071.4635 | 3071.4677 | -0.0042 | 0.5 |
| 12 | 0 | 12 | 13 | 1 | 13 | 3071.5921 | 3071.5944 | -0.0023 | 0.5 |
| 12 | 1 | 11 | 13 | 2 | 12 | 3071.4635 | 3071.4662 | -0.0027 | 0.5 |
| 13 | 1 | 13 | 14 | 0 | 14 | 3071.4673 | 3071.4726 | -0.0053 | 0.5 |
| 13 | 2 | 12 | 14 | 1 | 13 | 3071.3393 | 3071.3449 | -0.0056 | 0.5 |
| 13 | 0 | 13 | 14 | 1 | 14 | 3071.4673 | 3071.4726 | -0.0053 | 0.5 |
| 13 | 1 | 12 | 14 | 2 | 13 | 3071.3393 | 3071.3442 | -0.0049 | 0.5 |
| 14 | 1 | 14 | 15 | 0 | 15 | 3071.3471 | 3071.3507 | -0.0036 | 0.5 |
| 14 | 2 | 13 | 15 | 1 | 14 | 3071.2204 | 3071.2222 | -0.0018 | 0.5 |
| 14 | 0 | 14 | 15 | 1 | 15 | 3071.3471 | 3071.3507 | -0.0036 | 0.5 |
| 14 | 1 | 13 | 15 | 2 | 14 | 3071.2204 | 3071.2219 | -0.0015 | 0.5 |
| 15 | 1 | 15 | 16 | 0 | 16 | 3071.2285 | 3071.2289 | -0.0003 | 0.5 |
| 15 | 0 | 15 | 16 | 1 | 16 | 3071.2285 | 3071.2289 | -0.0003 | 0.5 |
| 16 | 1 | 16 | 17 | 0 | 17 | 3071.1026 | 3071.1069 | -0.0043 | 0.5 |
| 16 | 0 | 16 | 17 | 1 | 17 | 3071.1026 | 3071.1069 | -0.0043 | 0.5 |
| 17 | 1 | 17 | 18 | 0 | 18 | 3070.9809 | 3070.985  | -0.0041 | 0.5 |
| 17 | 0 | 17 | 18 | 1 | 18 | 3070.9809 | 3070.985  | -0.0041 | 0.5 |
| 18 | 1 | 18 | 19 | 0 | 19 | 3070.8578 | 3070.863  | -0.0052 | 0.5 |
| 18 | 0 | 18 | 19 | 1 | 19 | 3070.8578 | 3070.863  | -0.0052 | 0.5 |
| 19 | 1 | 19 | 20 | 0 | 20 | 3070.7369 | 3070.741  | -0.0041 | 0.5 |
| 19 | 0 | 19 | 20 | 1 | 20 | 3070.7369 | 3070.741  | -0.0041 | 0.5 |
| 20 | 1 | 20 | 21 | 0 | 21 | 3070.6149 | 3070.619  | -0.004  | 0.5 |
| 20 | 0 | 20 | 21 | 1 | 21 | 3070.6149 | 3070.619  | -0.004  | 0.5 |

R Branch:

|   |   |   |   |   |   |           |           |        |   |
|---|---|---|---|---|---|-----------|-----------|--------|---|
| 5 | 1 | 5 | 4 | 0 | 4 | 3073.9187 | 3073.9173 | 0.0014 | 1 |
| 5 | 0 | 5 | 4 | 1 | 4 | 3073.8827 | 3073.8818 | 0.001  | 1 |
| 6 | 1 | 6 | 5 | 0 | 5 | 3074.0302 | 3074.0287 | 0.0014 | 1 |
| 6 | 0 | 6 | 5 | 1 | 5 | 3074.0123 | 3074.0116 | 0.0007 | 1 |
| 7 | 1 | 7 | 6 | 0 | 6 | 3074.146  | 3074.1443 | 0.0017 | 1 |
| 7 | 2 | 6 | 6 | 1 | 5 | 3074.3294 | 3074.3291 | 0.0003 | 1 |
| 7 | 0 | 7 | 6 | 1 | 6 | 3074.1382 | 3074.1366 | 0.0016 | 1 |
| 7 | 1 | 6 | 6 | 2 | 5 | 3074.1964 | 3074.1931 | 0.0034 | 1 |
| 8 | 1 | 8 | 7 | 0 | 7 | 3074.264  | 3074.2625 | 0.0016 | 1 |
| 8 | 2 | 7 | 7 | 1 | 6 | 3074.4236 | 3074.4205 | 0.0031 | 1 |
| 8 | 0 | 8 | 7 | 1 | 7 | 3074.26   | 3074.2591 | 0.0008 | 1 |
| 8 | 1 | 7 | 7 | 2 | 6 | 3074.3453 | 3074.3444 | 0.0008 | 1 |
| 9 | 1 | 9 | 8 | 0 | 8 | 3074.3851 | 3074.3818 | 0.0033 | 1 |
| 9 | 2 | 8 | 8 | 1 | 7 | 3074.5227 | 3074.5213 | 0.0014 | 1 |
| 9 | 0 | 9 | 8 | 1 | 8 | 3074.3825 | 3074.3804 | 0.002  | 1 |

|    |   |    |    |   |    |           |           |         |     |
|----|---|----|----|---|----|-----------|-----------|---------|-----|
| 9  | 1 | 8  | 8  | 2 | 7  | 3074.482  | 3074.4822 | -0.0002 | 1   |
| 10 | 1 | 10 | 9  | 0 | 9  | 3074.5038 | 3074.5017 | 0.0021  | 0.5 |
| 10 | 2 | 9  | 9  | 1 | 8  | 3074.6323 | 3074.6301 | 0.0022  | 1   |
| 10 | 0 | 10 | 9  | 1 | 9  | 3074.5038 | 3074.5012 | 0.0026  | 0.5 |
| 10 | 1 | 9  | 9  | 2 | 8  | 3074.6115 | 3074.6112 | 0.0003  | 1   |
| 11 | 1 | 11 | 10 | 0 | 10 | 3074.6252 | 3074.6219 | 0.0033  | 0.5 |
| 11 | 2 | 10 | 10 | 1 | 9  | 3074.7475 | 3074.744  | 0.0035  | 1   |
| 11 | 0 | 11 | 10 | 1 | 10 | 3074.6252 | 3074.6216 | 0.0035  | 0.5 |
| 11 | 1 | 10 | 10 | 2 | 9  | 3074.7383 | 3074.7353 | 0.003   | 1   |
| 12 | 1 | 12 | 11 | 0 | 11 | 3074.7443 | 3074.7421 | 0.0022  | 0.5 |
| 12 | 2 | 11 | 11 | 1 | 10 | 3074.8608 | 3074.8608 | 0       | 1   |
| 12 | 0 | 12 | 11 | 1 | 11 | 3074.7443 | 3074.742  | 0.0023  | 0.5 |
| 12 | 1 | 11 | 11 | 2 | 10 | 3074.8577 | 3074.8569 | 0.0008  | 1   |
| 13 | 1 | 13 | 12 | 0 | 12 | 3074.8618 | 3074.8623 | -0.0005 | 0.5 |
| 13 | 2 | 12 | 12 | 1 | 11 | 3074.9785 | 3074.979  | -0.0005 | 1   |
| 13 | 0 | 13 | 12 | 1 | 12 | 3074.8618 | 3074.8623 | -0.0004 | 0.5 |
| 13 | 1 | 12 | 12 | 2 | 11 | 3074.9767 | 3074.9773 | -0.0006 | 1   |
| 14 | 1 | 14 | 13 | 0 | 13 | 3074.9845 | 3074.9825 | 0.0019  | 0.5 |
| 14 | 2 | 13 | 13 | 1 | 12 | 3075.0998 | 3075.0978 | 0.002   | 0.5 |
| 14 | 0 | 14 | 13 | 1 | 13 | 3074.9845 | 3074.9825 | 0.0019  | 0.5 |
| 14 | 1 | 13 | 13 | 2 | 12 | 3075.0998 | 3075.0971 | 0.0028  | 0.5 |
| 16 | 1 | 16 | 15 | 0 | 15 | 3075.2248 | 3075.2229 | 0.0019  | 0.5 |
| 16 | 2 | 15 | 15 | 1 | 14 | 3075.3348 | 3075.3362 | -0.0014 | 0.5 |
| 16 | 0 | 16 | 15 | 1 | 15 | 3075.2248 | 3075.2229 | 0.0019  | 0.5 |
| 16 | 1 | 15 | 15 | 2 | 14 | 3075.3348 | 3075.3361 | -0.0013 | 0.5 |
| 17 | 1 | 17 | 16 | 0 | 16 | 3075.3457 | 3075.3431 | 0.0027  | 0.5 |
| 17 | 2 | 16 | 16 | 1 | 15 | 3075.4534 | 3075.4555 | -0.0021 | 0.5 |
| 17 | 0 | 17 | 16 | 1 | 16 | 3075.3457 | 3075.3431 | 0.0027  | 0.5 |
| 17 | 1 | 16 | 16 | 2 | 15 | 3075.4534 | 3075.4555 | -0.002  | 0.5 |
| 18 | 1 | 18 | 17 | 0 | 17 | 3075.4647 | 3075.4632 | 0.0015  | 0.5 |
| 18 | 2 | 17 | 17 | 1 | 16 | 3075.5816 | 3075.5748 | 0.0068  | 0.5 |
| 18 | 0 | 18 | 17 | 1 | 17 | 3075.4647 | 3075.4632 | 0.0015  | 0.5 |
| 18 | 1 | 17 | 17 | 2 | 16 | 3075.5816 | 3075.5748 | 0.0068  | 0.5 |
| 19 | 1 | 19 | 18 | 0 | 18 | 3075.5856 | 3075.5833 | 0.0024  | 0.5 |
| 19 | 2 | 18 | 18 | 1 | 17 | 3075.6974 | 3075.6941 | 0.0032  | 0.5 |
| 19 | 0 | 19 | 18 | 1 | 18 | 3075.5856 | 3075.5833 | 0.0024  | 0.5 |
| 19 | 1 | 18 | 18 | 2 | 17 | 3075.6974 | 3075.6941 | 0.0033  | 0.5 |
| 20 | 1 | 20 | 19 | 0 | 19 | 3075.7061 | 3075.7033 | 0.0027  | 0.5 |
| 20 | 2 | 19 | 19 | 1 | 18 | 3075.8143 | 3075.8134 | 0.0009  | 0.5 |
| 20 | 0 | 20 | 19 | 1 | 19 | 3075.7061 | 3075.7033 | 0.0027  | 0.5 |
| 20 | 1 | 19 | 19 | 2 | 18 | 3075.8143 | 3075.8134 | 0.0009  | 0.5 |

|    |   |    |    |   |    |           |           |        |     |
|----|---|----|----|---|----|-----------|-----------|--------|-----|
| 21 | 1 | 21 | 20 | 0 | 20 | 3075.8256 | 3075.8233 | 0.0022 | 0.5 |
| 21 | 2 | 20 | 20 | 1 | 19 | 3075.9346 | 3075.9327 | 0.0019 | 0.5 |
| 21 | 0 | 21 | 20 | 1 | 20 | 3075.8256 | 3075.8233 | 0.0022 | 0.5 |
| 21 | 1 | 20 | 20 | 2 | 19 | 3075.9346 | 3075.9327 | 0.0019 | 0.5 |
| 22 | 1 | 22 | 21 | 0 | 21 | 3075.9437 | 3075.9433 | 0.0004 | 0.5 |
| 22 | 0 | 22 | 21 | 1 | 21 | 3075.9437 | 3075.9433 | 0.0004 | 0.5 |
