# Supplementary material for: Sub-Doppler infrared spectroscopy of resonance-stabilized hydrocarbon intermediates: ν3/ν4 CH stretch modes and CH2 internal rotor dynamics of benzyl radical
Source: Royal Society of Chemistry journal article supplement (doi:10.1039/c7cp05776h), 2017-01-01
Supplement: c7cp05776h6.pdf [file c7cp05776h6.pdf]

VI. Observed and fitted positions of the **nu\_4** excited state, assuming ground state fitted to combination differences from JILA data (nu\_3 and nu\_4 bands) plus Miller's LIF data

Residual std  
 dev: 0.0027

| Excited state (v=1): |     |     | Gnd State (v=0): |      |      | Observed            | Calculated          | Obs-<br>Calc        | Weighting factors |
|----------------------|-----|-----|------------------|------|------|---------------------|---------------------|---------------------|-------------------|
| J'                   | Ka' | Kc' | J''              | Ka'' | Kc'' | [cm <sup>-1</sup> ] | [cm <sup>-1</sup> ] | [cm <sup>-1</sup> ] |                   |
| P Branch:            |     |     |                  |      |      |                     |                     |                     |                   |
| 4                    | 0   | 4   | 5                | 0    | 5    | 3066.3841           | 3066.3852           | -0.0011             | 1                 |
| 4                    | 1   | 4   | 5                | 1    | 5    | 3066.3949           | 3066.3978           | -0.0029             | 1                 |
| 5                    | 0   | 5   | 6                | 0    | 6    | 3066.2656           | 3066.2672           | -0.0016             | 1                 |
| 5                    | 1   | 4   | 6                | 1    | 5    | 3066.1275           | 3066.1293           | -0.0018             | 1                 |
| 5                    | 1   | 5   | 6                | 1    | 6    | 3066.2721           | 3066.2739           | -0.0017             | 1                 |
| 5                    | 2   | 4   | 6                | 2    | 5    | 3066.1769           | 3066.1785           | -0.0016             | 1                 |
| 6                    | 0   | 6   | 7                | 0    | 7    | 3066.1469           | 3066.1483           | -0.0013             | 1                 |
| 6                    | 1   | 5   | 7                | 1    | 6    | 3066.0068           | 3066.007            | -0.0002             | 1                 |
| 6                    | 1   | 6   | 7                | 1    | 7    | 3066.15             | 3066.1515           | -0.0015             | 1                 |
| 6                    | 2   | 5   | 7                | 2    | 6    | 3066.0442           | 3066.0452           | -0.001              | 1                 |
| 7                    | 0   | 7   | 8                | 0    | 8    | 3066.0268           | 3066.0286           | -0.0018             | 1                 |
| 7                    | 1   | 6   | 8                | 1    | 7    | 3065.8899           | 3065.8909           | -0.001              | 1                 |
| 7                    | 1   | 7   | 8                | 1    | 8    | 3066.0301           | 3066.0301           | 0                   | 1                 |
| 7                    | 2   | 6   | 8                | 2    | 7    | 3065.9138           | 3065.9159           | -0.0021             | 1                 |
| 8                    | 0   | 8   | 9                | 0    | 9    | 3065.9099           | 3065.9085           | 0.0014              | 1                 |
| 8                    | 1   | 7   | 9                | 1    | 8    | 3065.7739           | 3065.7756           | -0.0017             | 1                 |
| 8                    | 1   | 8   | 9                | 1    | 9    | 3065.9099           | 3065.9091           | 0.0007              | 1                 |
| 8                    | 2   | 7   | 9                | 2    | 8    | 3065.7878           | 3065.7899           | -0.0021             | 1                 |
| 9                    | 0   | 9   | 10               | 0    | 10   | 3065.7867           | 3065.7882           | -0.0015             | 1                 |
| 9                    | 1   | 8   | 10               | 1    | 9    | 3065.6573           | 3065.6589           | -0.0015             | 1                 |
| 9                    | 1   | 9   | 10               | 1    | 10   | 3065.7867           | 3065.7885           | -0.0017             | 1                 |
| 9                    | 2   | 8   | 10               | 2    | 9    | 3065.6656           | 3065.6663           | -0.0007             | 1                 |
| 10                   | 0   | 10  | 11               | 0    | 11   | 3065.6656           | 3065.6679           | -0.0023             | 1                 |
| 10                   | 1   | 9   | 11               | 1    | 10   | 3065.5392           | 3065.5405           | -0.0014             | 1                 |
| 10                   | 1   | 10  | 11               | 1    | 11   | 3065.6656           | 3065.668            | -0.0024             | 1                 |
| 10                   | 2   | 9   | 11               | 2    | 10   | 3065.5435           | 3065.5441           | -0.0006             | 1                 |
| 11                   | 0   | 11  | 12               | 0    | 12   | 3065.5452           | 3065.5476           | -0.0024             | 1                 |
| 11                   | 1   | 10  | 12               | 1    | 11   | 3065.4209           | 3065.4212           | -0.0002             | 1                 |

|    |   |    |    |   |    |           |           |         |   |
|----|---|----|----|---|----|-----------|-----------|---------|---|
| 11 | 1 | 11 | 12 | 1 | 12 | 3065.5452 | 3065.5476 | -0.0025 | 1 |
| 11 | 2 | 10 | 12 | 2 | 11 | 3065.4209 | 3065.4228 | -0.0019 | 1 |
| 12 | 0 | 12 | 13 | 0 | 13 | 3065.4253 | 3065.4273 | -0.002  | 1 |
| 12 | 1 | 11 | 13 | 1 | 12 | 3065.2955 | 3065.3013 | -0.0058 | 1 |
| 12 | 1 | 12 | 13 | 1 | 13 | 3065.4252 | 3065.4273 | -0.0021 | 1 |
| 12 | 2 | 11 | 13 | 2 | 12 | 3065.2955 | 3065.302  | -0.0065 | 1 |
| 13 | 0 | 13 | 14 | 0 | 14 | 3065.2984 | 3065.3071 | -0.0088 | 1 |
| 13 | 1 | 12 | 14 | 1 | 13 | 3065.1792 | 3065.1811 | -0.0019 | 1 |
| 13 | 1 | 13 | 14 | 1 | 14 | 3065.2984 | 3065.3071 | -0.0088 | 1 |
| 13 | 2 | 12 | 14 | 2 | 13 | 3065.1792 | 3065.1814 | -0.0022 | 1 |
| 14 | 0 | 14 | 15 | 0 | 15 | 3065.184  | 3065.187  | -0.003  | 1 |
| 14 | 1 | 13 | 15 | 1 | 14 | 3065.0605 | 3065.0609 | -0.0004 | 1 |
| 14 | 1 | 14 | 15 | 1 | 15 | 3065.184  | 3065.187  | -0.003  | 1 |
| 14 | 2 | 13 | 15 | 2 | 14 | 3065.0605 | 3065.061  | -0.0005 | 1 |
| 15 | 0 | 15 | 16 | 0 | 16 | 3065.064  | 3065.0669 | -0.0029 | 1 |
| 15 | 1 | 15 | 16 | 1 | 16 | 3065.064  | 3065.0669 | -0.0029 | 1 |

R

Branch:

|   |   |   |   |   |   |           |           |         |   |
|---|---|---|---|---|---|-----------|-----------|---------|---|
| 3 | 0 | 3 | 2 | 0 | 2 | 3067.4886 | 3067.4872 | 0.0014  | 1 |
| 3 | 1 | 3 | 2 | 1 | 2 | 3067.4631 | 3067.4619 | 0.0012  | 1 |
| 4 | 0 | 4 | 3 | 0 | 3 | 3067.6125 | 3067.6113 | 0.0012  | 1 |
| 4 | 1 | 3 | 3 | 1 | 2 | 3067.7066 | 3067.7044 | 0.0022  | 1 |
| 4 | 1 | 4 | 3 | 1 | 3 | 3067.5931 | 3067.5913 | 0.0018  | 1 |
| 5 | 0 | 5 | 4 | 0 | 4 | 3067.7316 | 3067.7303 | 0.0013  | 1 |
| 5 | 1 | 5 | 4 | 1 | 4 | 3067.7194 | 3067.7179 | 0.0015  | 1 |
| 5 | 2 | 4 | 4 | 2 | 3 | 3067.7974 | 3067.7972 | 0.0003  | 1 |
| 6 | 0 | 6 | 5 | 0 | 5 | 3067.8508 | 3067.8489 | 0.0019  | 1 |
| 6 | 1 | 5 | 5 | 1 | 4 | 3067.9845 | 3067.9833 | 0.0012  | 1 |
| 6 | 1 | 6 | 5 | 1 | 5 | 3067.8438 | 3067.8423 | 0.0015  | 1 |
| 6 | 2 | 5 | 5 | 2 | 4 | 3067.9347 | 3067.9349 | -0.0001 | 1 |
| 6 | 3 | 4 | 5 | 3 | 3 | 3067.9775 | 3067.9762 | 0.0013  | 1 |
| 6 | 4 | 3 | 5 | 4 | 2 | 3067.9793 | 3067.9791 | 0.0001  | 1 |
| 7 | 0 | 7 | 6 | 0 | 6 | 3067.9711 | 3067.9685 | 0.0026  | 1 |
| 7 | 1 | 6 | 6 | 1 | 5 | 3068.107  | 3068.1055 | 0.0015  | 1 |
| 7 | 1 | 7 | 6 | 1 | 6 | 3067.9712 | 3067.9654 | 0.0058  | 1 |
| 7 | 2 | 6 | 6 | 2 | 5 | 3068.0654 | 3068.0682 | -0.0028 | 1 |
| 8 | 0 | 8 | 7 | 0 | 7 | 3068.092  | 3068.089  | 0.003   | 1 |
| 8 | 1 | 7 | 7 | 1 | 6 | 3068.2228 | 3068.2219 | 0.0009  | 1 |
| 8 | 1 | 8 | 7 | 1 | 7 | 3068.0882 | 3068.0876 | 0.0006  | 1 |
| 8 | 2 | 7 | 7 | 2 | 6 | 3068.1992 | 3068.1975 | 0.0017  | 1 |
| 9 | 0 | 9 | 8 | 0 | 8 | 3068.2114 | 3068.2101 | 0.0012  | 1 |
| 9 | 1 | 8 | 8 | 1 | 7 | 3068.3395 | 3068.3376 | 0.0019  | 1 |

|    |   |    |    |   |    |           |           |         |   |
|----|---|----|----|---|----|-----------|-----------|---------|---|
| 9  | 1 | 9  | 8  | 1 | 8  | 3068.2114 | 3068.2095 | 0.0019  | 1 |
| 9  | 2 | 8  | 8  | 2 | 7  | 3068.3243 | 3068.3237 | 0.0006  | 1 |
| 10 | 0 | 10 | 9  | 0 | 9  | 3068.33   | 3068.3316 | -0.0015 | 1 |
| 10 | 1 | 9  | 9  | 1 | 8  | 3068.4577 | 3068.455  | 0.0027  | 1 |
| 10 | 1 | 10 | 9  | 1 | 9  | 3068.33   | 3068.3313 | -0.0013 | 1 |
| 10 | 2 | 9  | 9  | 2 | 8  | 3068.4478 | 3068.4478 | 0       | 1 |
| 11 | 0 | 11 | 10 | 0 | 10 | 3068.4561 | 3068.4532 | 0.0029  | 1 |
| 11 | 1 | 10 | 10 | 1 | 9  | 3068.5761 | 3068.5741 | 0.002   | 1 |
| 11 | 1 | 11 | 10 | 1 | 10 | 3068.4561 | 3068.4531 | 0.003   | 1 |
| 12 | 0 | 12 | 11 | 0 | 11 | 3068.5761 | 3068.575  | 0.0011  | 1 |
| 12 | 1 | 11 | 11 | 1 | 10 | 3068.6968 | 3068.6943 | 0.0025  | 1 |
| 12 | 1 | 12 | 11 | 1 | 11 | 3068.5761 | 3068.5749 | 0.0012  | 1 |
| 12 | 2 | 11 | 11 | 2 | 10 | 3068.6968 | 3068.6927 | 0.0041  | 1 |
| 13 | 0 | 13 | 12 | 0 | 12 | 3068.7022 | 3068.6968 | 0.0054  | 1 |
| 13 | 1 | 12 | 12 | 1 | 11 | 3068.8164 | 3068.8152 | 0.0011  | 1 |
| 13 | 1 | 13 | 12 | 1 | 12 | 3068.7022 | 3068.6968 | 0.0054  | 1 |
| 13 | 2 | 12 | 12 | 2 | 11 | 3068.8164 | 3068.8145 | 0.0019  | 1 |
| 14 | 0 | 14 | 13 | 0 | 13 | 3068.8238 | 3068.8188 | 0.005   | 1 |
| 14 | 1 | 13 | 13 | 1 | 12 | 3068.9396 | 3068.9365 | 0.0031  | 1 |
| 14 | 1 | 14 | 13 | 1 | 13 | 3068.8238 | 3068.8188 | 0.005   | 1 |
| 14 | 2 | 12 | 13 | 2 | 11 | 3069.0594 | 3069.0598 | -0.0003 | 1 |
| 14 | 2 | 13 | 13 | 2 | 12 | 3068.9396 | 3068.9362 | 0.0034  | 1 |
| 15 | 0 | 15 | 14 | 0 | 14 | 3068.944  | 3068.9408 | 0.0031  | 1 |
| 15 | 1 | 14 | 14 | 1 | 13 | 3069.0594 | 3069.058  | 0.0014  | 1 |
| 15 | 1 | 15 | 14 | 1 | 14 | 3068.944  | 3068.9408 | 0.0031  | 1 |
| 15 | 2 | 14 | 14 | 2 | 13 | 3069.0594 | 3069.0579 | 0.0015  | 1 |
